# Supplementary material for: A case of esophageal squamous cell carcinoma with epidermization showing a unique morphology
Source: PubMed Central journal article supplement (PMC11785629; doi:10.1007/s12328-024-02042-6), 2024-10-18
Supplement: 12328_2024_2042_MOESM1_ESM.pdf [file 12328_2024_2042_MOESM1_ESM.pdf]

Supplementary 1. Cancer-related genes included in MSK-IMPACT

|                |               |                |                |                  |               |                |                 |                |                |                |                 |
|----------------|---------------|----------------|----------------|------------------|---------------|----------------|-----------------|----------------|----------------|----------------|-----------------|
| <i>ABL1</i>    | <i>BMPR1A</i> | <i>CRLF2</i>   | <i>ERBB4</i>   | <i>GATA3</i>     | <i>IGF2</i>   | <i>MAP3K13</i> | <i>NFKBIA</i>   | <i>PLCG2</i>   | <i>RB1</i>     | <i>SMAD3</i>   | <i>TMPRSS2</i>  |
| <i>ACVR1</i>   | <i>BRAF</i>   | <i>CSDE1</i>   | <i>ERCC2</i>   | <i>GLI1</i>      | <i>IKBKE</i>  | <i>MAP3K14</i> | <i>NKX2-1</i>   | <i>PLK2</i>    | <i>RBM10</i>   | <i>SMAD4</i>   | <i>TNFAIP3</i>  |
| <i>AGO2</i>    | <i>BRCA1</i>  | <i>CSF1R</i>   | <i>ERCC3</i>   | <i>GNAI1</i>     | <i>IKZF1</i>  | <i>MAPK1</i>   | <i>NKX3-1</i>   | <i>PMAIP1</i>  | <i>RECQL</i>   | <i>SMARCA4</i> | <i>TNFRSF14</i> |
| <i>AKT1</i>    | <i>BRCA2</i>  | <i>CSF3R</i>   | <i>ERCC4</i>   | <i>GNAQ</i>      | <i>IL10</i>   | <i>MAPK3</i>   | <i>NOTCH1</i>   | <i>PMS1</i>    | <i>RECQL4</i>  | <i>SMARCB1</i> | <i>TOP1</i>     |
| <i>AKT2</i>    | <i>BRD4</i>   | <i>CTCF</i>    | <i>ERCC5</i>   | <i>GNAS</i>      | <i>IL7R</i>   | <i>MAPKAP1</i> | <i>NOTCH2</i>   | <i>PMS2</i>    | <i>REL</i>     | <i>SMARCD1</i> | <i>TP53</i>     |
| <i>AKT3</i>    | <i>BRIP1</i>  | <i>CTLA4</i>   | <i>ERF</i>     | <i>GPS2</i>      | <i>INHA</i>   | <i>MAX</i>     | <i>NOTCH3</i>   | <i>PNRC1</i>   | <i>RET</i>     | <i>SMO</i>     | <i>TP53BP1</i>  |
| <i>ALK</i>     | <i>BTK</i>    | <i>CYNNB1</i>  | <i>ERG</i>     | <i>GREM1</i>     | <i>INHBA</i>  | <i>MCL1</i>    | <i>NOTCH4</i>   | <i>POLD1</i>   | <i>RFWD2</i>   | <i>SMYD3</i>   | <i>TP63</i>     |
| <i>ALOX12B</i> | <i>CALR</i>   | <i>CUL3</i>    | <i>ERRF1</i>   | <i>GRIN2A</i>    | <i>INPP4A</i> | <i>MDC1</i>    | <i>NPM1</i>     | <i>POLE</i>    | <i>RHEB</i>    | <i>SOCS1</i>   | <i>TRAF2</i>    |
| <i>AMER1</i>   | <i>CARD11</i> | <i>CXCR4</i>   | <i>ESR1</i>    | <i>GSK3B</i>     | <i>INPP4B</i> | <i>MDM2</i>    | <i>NRAS</i>     | <i>PPARG</i>   | <i>RHOA</i>    | <i>SOS1</i>    | <i>TRAF7</i>    |
| <i>ANKRD11</i> | <i>CARM1</i>  | <i>CYLD</i>    | <i>ETV1</i>    | <i>H3F3A</i>     | <i>INPPL1</i> | <i>MDM4</i>    | <i>NSD1</i>     | <i>PPM1D</i>   | <i>RICTOR</i>  | <i>SOX17</i>   | <i>TSC1</i>     |
| <i>APC</i>     | <i>CASP8</i>  | <i>CYSLTR2</i> | <i>ETV6</i>    | <i>H3F3B</i>     | <i>INSR</i>   | <i>MED12</i>   | <i>NTHL1</i>    | <i>PPP2R1A</i> | <i>RIT1</i>    | <i>SOX2</i>    | <i>TSC2</i>     |
| <i>AR</i>      | <i>CBFB</i>   | <i>DAXX</i>    | <i>EZH1</i>    | <i>H3F3C</i>     | <i>IRF4</i>   | <i>MEF2B</i>   | <i>NTRK1</i>    | <i>PPP4R2</i>  | <i>RNF43</i>   | <i>SOX9</i>    | <i>TSHR</i>     |
| <i>ARAF</i>    | <i>CBL</i>    | <i>DCUN1D1</i> | <i>EZH2</i>    | <i>HGF</i>       | <i>IRS1</i>   | <i>MEN1</i>    | <i>NTRK2</i>    | <i>PPP6C</i>   | <i>ROS1</i>    | <i>SPEN</i>    | <i>U2AF1</i>    |
| <i>ARID1A</i>  | <i>CCND1</i>  | <i>DDR2</i>    | <i>FAM175A</i> | <i>HIST1H1C</i>  | <i>IRS2</i>   | <i>MET</i>     | <i>NTRK3</i>    | <i>PRDM1</i>   | <i>RPS6KA4</i> | <i>SPOP</i>    | <i>UPF1</i>     |
| <i>ARID1B</i>  | <i>CCND2</i>  | <i>DICER1</i>  | <i>FAM46C</i>  | <i>HIST1H2BD</i> | <i>JAK1</i>   | <i>MGA</i>     | <i>NUF2</i>     | <i>PRDM14</i>  | <i>RPS6KB2</i> | <i>SPRED1</i>  | <i>VEGFA</i>    |
| <i>ARID2</i>   | <i>CCND3</i>  | <i>DIS3</i>    | <i>FAM58A</i>  | <i>HIST1H3A</i>  | <i>JAK2</i>   | <i>MITF</i>    | <i>NUP93</i>    | <i>PREX2</i>   | <i>RPTOR</i>   | <i>SRC</i>     | <i>VHL</i>      |
| <i>ARID5B</i>  | <i>CCNE1</i>  | <i>DNAB1</i>   | <i>FANCA</i>   | <i>HIST1H3B</i>  | <i>JAK3</i>   | <i>MLH1</i>    | <i>PAK1</i>     | <i>PRKAR1A</i> | <i>RRAGC</i>   | <i>SRSF2</i>   | <i>VTCN1</i>    |
| <i>ASXL1</i>   | <i>CD274</i>  | <i>DNMT1</i>   | <i>FANCC</i>   | <i>HIST1H3C</i>  | <i>JUN</i>    | <i>MPL</i>     | <i>PAK7</i>     | <i>PRKC1</i>   | <i>RRAS</i>    | <i>STAG2</i>   | <i>WHSC1</i>    |
| <i>ASXL2</i>   | <i>CD276</i>  | <i>DNMT3A</i>  | <i>FAT1</i>    | <i>HIST1H3D</i>  | <i>KDM5A</i>  | <i>MRE11A</i>  | <i>PALB2</i>    | <i>PRKD1</i>   | <i>RRAS2</i>   | <i>STAT3</i>   | <i>WHSC1L1</i>  |
| <i>ATM</i>     | <i>CD79A</i>  | <i>DNMT3B</i>  | <i>FBXW7</i>   | <i>HIST1H3E</i>  | <i>KDM5C</i>  | <i>MSH2</i>    | <i>PARK2</i>    | <i>PTCH1</i>   | <i>RTEL1</i>   | <i>STAT5A</i>  | <i>WT1</i>      |
| <i>ATR</i>     | <i>CD79B</i>  | <i>DOT1L</i>   | <i>FGF19</i>   | <i>HIST1H3F</i>  | <i>KDM6A</i>  | <i>MSH3</i>    | <i>PARP1</i>    | <i>PTEN</i>    | <i>RUNX1</i>   | <i>STAT5B</i>  | <i>WWTR1</i>    |
| <i>ATRX</i>    | <i>CDC42</i>  | <i>DROSHA</i>  | <i>FGF3</i>    | <i>HIST1H3G</i>  | <i>KDR</i>    | <i>MSH6</i>    | <i>PAX5</i>     | <i>PTP4A1</i>  | <i>RXRA</i>    | <i>STK11</i>   | <i>XIAP</i>     |
| <i>AURKA</i>   | <i>CDC73</i>  | <i>DUSP4</i>   | <i>FGF4</i>    | <i>HIST1H3H</i>  | <i>KEAP1</i>  | <i>MSI1</i>    | <i>PBRM1</i>    | <i>PTPN11</i>  | <i>RYBP</i>    | <i>STK19</i>   | <i>XPO1</i>     |
| <i>AURKB</i>   | <i>CDH1</i>   | <i>E2F3</i>    | <i>FGFR1</i>   | <i>HIST1H3I</i>  | <i>KIT</i>    | <i>MSI2</i>    | <i>PDCD1</i>    | <i>PTPRD</i>   | <i>SDHA</i>    | <i>STK40</i>   | <i>XRCC2</i>    |
| <i>AXIN1</i>   | <i>CDK12</i>  | <i>EED</i>     | <i>FGFR2</i>   | <i>HIST1H3J</i>  | <i>KLF4</i>   | <i>MST1</i>    | <i>PDCD1LG2</i> | <i>PTPRS</i>   | <i>SDHAF2</i>  | <i>SUFU</i>    | <i>YAP1</i>     |
| <i>AXIN2</i>   | <i>CDK4</i>   | <i>EGFL7</i>   | <i>FGFR3</i>   | <i>HIST2H3C</i>  | <i>KMT2A</i>  | <i>MST1R</i>   | <i>PDGFRA</i>   | <i>PTPRT</i>   | <i>SDHB</i>    | <i>SUZ12</i>   | <i>YES1</i>     |
| <i>AXL</i>     | <i>CDK6</i>   | <i>EGFR</i>    | <i>FGFR4</i>   | <i>HIST2H3D</i>  | <i>KMT2B</i>  | <i>MTOR</i>    | <i>PDGFRB</i>   | <i>RAB35</i>   | <i>SDHC</i>    | <i>SYK</i>     | <i>ZFHX3</i>    |
| <i>B2M</i>     | <i>CDK8</i>   | <i>EIF1AX</i>  | <i>FH</i>      | <i>HIST3H3</i>   | <i>KMT2C</i>  | <i>MUTYH</i>   | <i>PDPK1</i>    | <i>RAC1</i>    | <i>SDHD</i>    | <i>TAP1</i>    |                 |
| <i>BABAM1</i>  | <i>CDKN1A</i> | <i>EIF4A2</i>  | <i>FLCN</i>    | <i>HLA-A</i>     | <i>KMT2D</i>  | <i>MYC</i>     | <i>PGR</i>      | <i>RAC2</i>    | <i>SESN1</i>   | <i>TAP2</i>    |                 |
| <i>BAP1</i>    | <i>CDKN1B</i> | <i>EIF4E</i>   | <i>FLT1</i>    | <i>HLA-B</i>     | <i>KNSTRN</i> | <i>MYCL1</i>   | <i>PHOX2B</i>   | <i>RAD21</i>   | <i>SESN2</i>   | <i>TBX3</i>    |                 |
| <i>BARD1</i>   | <i>CDKN2A</i> | <i>ELF3</i>    | <i>FLT3</i>    | <i>HNF1A</i>     | <i>KRAS</i>   | <i>MYCN</i>    | <i>PIK3C2G</i>  | <i>RAD50</i>   | <i>SESN3</i>   | <i>TCEB1</i>   |                 |
| <i>BBC3</i>    | <i>CDKN2B</i> | <i>EP300</i>   | <i>FLT4</i>    | <i>HOXB13</i>    | <i>LATS1</i>  | <i>MYD88</i>   | <i>PIK3C3</i>   | <i>RAD51</i>   | <i>SETD2</i>   | <i>TCF3</i>    |                 |
| <i>BCL10</i>   | <i>CDKN2C</i> | <i>EPAS1</i>   | <i>FOXA1</i>   | <i>HRAS</i>      | <i>LATS2</i>  | <i>MYOD1</i>   | <i>PIK3CA</i>   | <i>RAD51B</i>  | <i>SETD8</i>   | <i>TCF7L2</i>  |                 |
| <i>BCL2</i>    | <i>CEBPA</i>  | <i>EPCAM</i>   | <i>FOXL2</i>   | <i>ICOSLG</i>    | <i>LMO1</i>   | <i>NBN</i>     | <i>PIK3CB</i>   | <i>RAD51C</i>  | <i>SF3B1</i>   | <i>TEK</i>     |                 |
| <i>BCL2L1</i>  | <i>CENPA</i>  | <i>EPHA3</i>   | <i>FOXP1</i>   | <i>ID3</i>       | <i>LYN</i>    | <i>NCOA3</i>   | <i>PIK3CD</i>   | <i>RAD51D</i>  | <i>SH2B3</i>   | <i>TERT</i>    |                 |
| <i>BCL2L11</i> | <i>CHEK1</i>  | <i>EPHA5</i>   | <i>FOXP1</i>   | <i>IDH1</i>      | <i>MALT1</i>  | <i>NCOR1</i>   | <i>PIK3CG</i>   | <i>RAD52</i>   | <i>SH2D1A</i>  | <i>TET1</i>    |                 |
| <i>BCL6</i>    | <i>CHEK2</i>  | <i>EPHA7</i>   | <i>FUBP1</i>   | <i>IDH2</i>      | <i>MAP2K1</i> | <i>NEGR1</i>   | <i>PIK3R1</i>   | <i>RAD54L</i>  | <i>SHOC2</i>   | <i>TET2</i>    |                 |
| <i>BCOR</i>    | <i>CIC</i>    | <i>EPHB1</i>   | <i>FYN</i>     | <i>IFNGR1</i>    | <i>MAP2K2</i> | <i>NF1</i>     | <i>PIK3R2</i>   | <i>RAF1</i>    | <i>SHQ1</i>    | <i>TGFBR1</i>  |                 |
| <i>BIRC3</i>   | <i>CREBBP</i> | <i>ERBB2</i>   | <i>GATA1</i>   | <i>IGF1</i>      | <i>MAP2K4</i> | <i>NF2</i>     | <i>PIK3R3</i>   | <i>RARA</i>    | <i>SLX4</i>    | <i>TGFBR2</i>  |                 |
| <i>BLM</i>     | <i>CRKL</i>   | <i>ERBB3</i>   | <i>GATA2</i>   | <i>IGF1R</i>     | <i>MAP3K1</i> | <i>NFE2L2</i>  | <i>PIM1</i>     | <i>RASA1</i>   | <i>SMAD2</i>   | <i>TMEM127</i> |                 |
